# Supplementary material for: On the Use of Assistive Technology during the COVID-19 Outbreak: Results and Lessons Learned from Pilot Studies
Source: MDPI journal article supplement (doi:10.3390/s22176631), 2022-09-02
Supplement: s1 [file s1]

**Table S1 .** Constructs and Items of the questionnaire used for the telepresence service. Participants were asked to rate each construct on a 5 points Likert Scale.

| Acronym | Construct             | Item ("I think that...")<br>¥=robot or tablet                                                                                                   |
|---------|-----------------------|-------------------------------------------------------------------------------------------------------------------------------------------------|
| ITU     | Intention of use      | I would use ¥ in case of necessity<br>I would use ¥ in case my family need it<br>¥ will increase my independence                                |
| ANX     | Anxiety               | I feel nervous using ¥<br>¥ is too invasive for my privacy                                                                                      |
| ENJ     | Enjoyment             | I will enjoy using the ¥                                                                                                                        |
| TRUST   | Trust                 | I would trust the ¥ if it gave me advice                                                                                                        |
| PEU     | Perceived ease of use | the ¥ is ease of use<br>I find easily the button to stop the service<br>The interface is ease of use<br>Talk to the caregiver through ¥ is easy |
| SI      | Social Influence      | I feel embarrassed to use ¥                                                                                                                     |

**Table S2.** ALMERE selected construct and items and results of the online questionnaire administrated for the disinfection service. Participants were asked to rate each construct on a 5 points Likert Scale.

| Acronym | Construct             | Item ("I think that...")                                | Mean | SD   | Mode |
|---------|-----------------------|---------------------------------------------------------|------|------|------|
| ANX     | Anxiety               | The robot scares me                                     | 3.50 | 1.07 | 4.00 |
|         |                       | The robot makes me anxious                              |      |      |      |
| ITU     | Intention of use      | I would often use the robot in my job                   | 3.73 | 1.03 | 4.00 |
| PU      | Perceived usability   | The robot could support me                              | 3.66 | 1.06 | 4.00 |
|         |                       | It will be convenient for me to use the robot in my job |      |      |      |
| PEOU    | Perceived ease of use | The robot is easy to use                                | 3.65 | 0.63 | 3.67 |
|         |                       | I would need a person that helps me with the use        |      |      |      |
|         |                       | Persons could easily learn to use it                    |      |      |      |
| PENJ    | Perceived enjoyment   | I will enjoy using the robot                            | 4.14 | 0.83 | 5.00 |
| SI      | Social Influence      | I would give a good impression if I'll use the robot    | 3.64 | 1.13 | 3.00 |
|         |                       | Colleagues would like me to use the robot               |      |      |      |
| TRUST   | Trust                 | I would trust the robot if it gave me advice            | 3.73 | 0.91 | 4.00 |
|         |                       | I would follow the advice the robot gives me            |      |      |      |
